# Supplementary material for: Effect of Acute Illness on Contact Patterns, Malawi, 2017
Source: PubMed Central journal article supplement (PMC6924881; doi:10.3201/eid2601.181539), 2020-01
Supplement: 18-1539-Techapp-s1.pdf [file 18-1539-Techapp-s1.pdf]

# Effects of Acute Illness on Contact Patterns, Malawi, 2017

## Appendix 1

PICTORIAL CONTACT DIARY      Visit number \_\_\_\_\_      Diary type 1. Client 2. Caregiver  
 CRS No. \_\_\_\_\_      Name \_\_\_\_\_      Date \_\_\_\_\_      Sheet \_\_\_\_\_

| INITIALS | Gender |   | Age (years) |      |       |     | Relationship        |                            |         | Where did you have contact? (Tick all which apply) |                  |             |           |                     |                         |       | Indoor or outdoor (Can tick both) |         | Did you touch his/her skin? (Tick only one) |    | Regularity How often do you meet this person? |                       |                          |                  | Duration of contact How much time did you spend with the person? |              |           |       |  |
|----------|--------|---|-------------|------|-------|-----|---------------------|----------------------------|---------|----------------------------------------------------|------------------|-------------|-----------|---------------------|-------------------------|-------|-----------------------------------|---------|---------------------------------------------|----|-----------------------------------------------|-----------------------|--------------------------|------------------|------------------------------------------------------------------|--------------|-----------|-------|--|
|          | M      | F | 0-6         | 8-19 | 20-49 | ≥50 | Member of household | Member of workplace/school | Neither | Home                                               | School/workplace | Market/shop | Transport | Healthcare facility | Church/place of worship | Other | Indoor                            | Outdoor | Yes                                         | No | Daily or almost daily                         | Once or twice a month | Less than once per month | Never met before | 1-10mins                                                         | >10min - 1hr | >1 - 4hrs | >4hrs |  |
|          |        |   |             |      |       |     |                     |                            |         |                                                    |                  |             |           |                     |                         |       |                                   |         |                                             |    |                                               |                       |                          |                  |                                                                  |              |           |       |  |
| 1        |        |   |             |      |       |     |                     |                            |         |                                                    |                  |             |           |                     |                         |       |                                   |         |                                             |    |                                               |                       |                          |                  |                                                                  |              |           |       |  |
| 2        |        |   |             |      |       |     |                     |                            |         |                                                    |                  |             |           |                     |                         |       |                                   |         |                                             |    |                                               |                       |                          |                  |                                                                  |              |           |       |  |
| 3        |        |   |             |      |       |     |                     |                            |         |                                                    |                  |             |           |                     |                         |       |                                   |         |                                             |    |                                               |                       |                          |                  |                                                                  |              |           |       |  |
| 4        |        |   |             |      |       |     |                     |                            |         |                                                    |                  |             |           |                     |                         |       |                                   |         |                                             |    |                                               |                       |                          |                  |                                                                  |              |           |       |  |
| 5        |        |   |             |      |       |     |                     |                            |         |                                                    |                  |             |           |                     |                         |       |                                   |         |                                             |    |                                               |                       |                          |                  |                                                                  |              |           |       |  |
| 6        |        |   |             |      |       |     |                     |                            |         |                                                    |                  |             |           |                     |                         |       |                                   |         |                                             |    |                                               |                       |                          |                  |                                                                  |              |           |       |  |
| 7        |        |   |             |      |       |     |                     |                            |         |                                                    |                  |             |           |                     |                         |       |                                   |         |                                             |    |                                               |                       |                          |                  |                                                                  |              |           |       |  |
| 8        |        |   |             |      |       |     |                     |                            |         |                                                    |                  |             |           |                     |                         |       |                                   |         |                                             |    |                                               |                       |                          |                  |                                                                  |              |           |       |  |
| 9        |        |   |             |      |       |     |                     |                            |         |                                                    |                  |             |           |                     |                         |       |                                   |         |                                             |    |                                               |                       |                          |                  |                                                                  |              |           |       |  |
| 10       |        |   |             |      |       |     |                     |                            |         |                                                    |                  |             |           |                     |                         |       |                                   |         |                                             |    |                                               |                       |                          |                  |                                                                  |              |           |       |  |
| 11       |        |   |             |      |       |     |                     |                            |         |                                                    |                  |             |           |                     |                         |       |                                   |         |                                             |    |                                               |                       |                          |                  |                                                                  |              |           |       |  |
| 12       |        |   |             |      |       |     |                     |                            |         |                                                    |                  |             |           |                     |                         |       |                                   |         |                                             |    |                                               |                       |                          |                  |                                                                  |              |           |       |  |
| 13       |        |   |             |      |       |     |                     |                            |         |                                                    |                  |             |           |                     |                         |       |                                   |         |                                             |    |                                               |                       |                          |                  |                                                                  |              |           |       |  |
| 14       |        |   |             |      |       |     |                     |                            |         |                                                    |                  |             |           |                     |                         |       |                                   |         |                                             |    |                                               |                       |                          |                  |                                                                  |              |           |       |  |
| 15       |        |   |             |      |       |     |                     |                            |         |                                                    |                  |             |           |                     |                         |       |                                   |         |                                             |    |                                               |                       |                          |                  |                                                                  |              |           |       |  |
