# Supplementary material for: Effect of Acute Illness on Contact Patterns, Malawi, 2017
Source: PubMed Central journal article supplement (PMC6924881; doi:10.3201/eid2601.181539), 2020-01
Supplement: 18-1539-Techapp-s2.pdf [file 18-1539-Techapp-s2.pdf]

# Effects of Acute Illness on Contact Patterns, Malawi, 2017

## Appendix 2

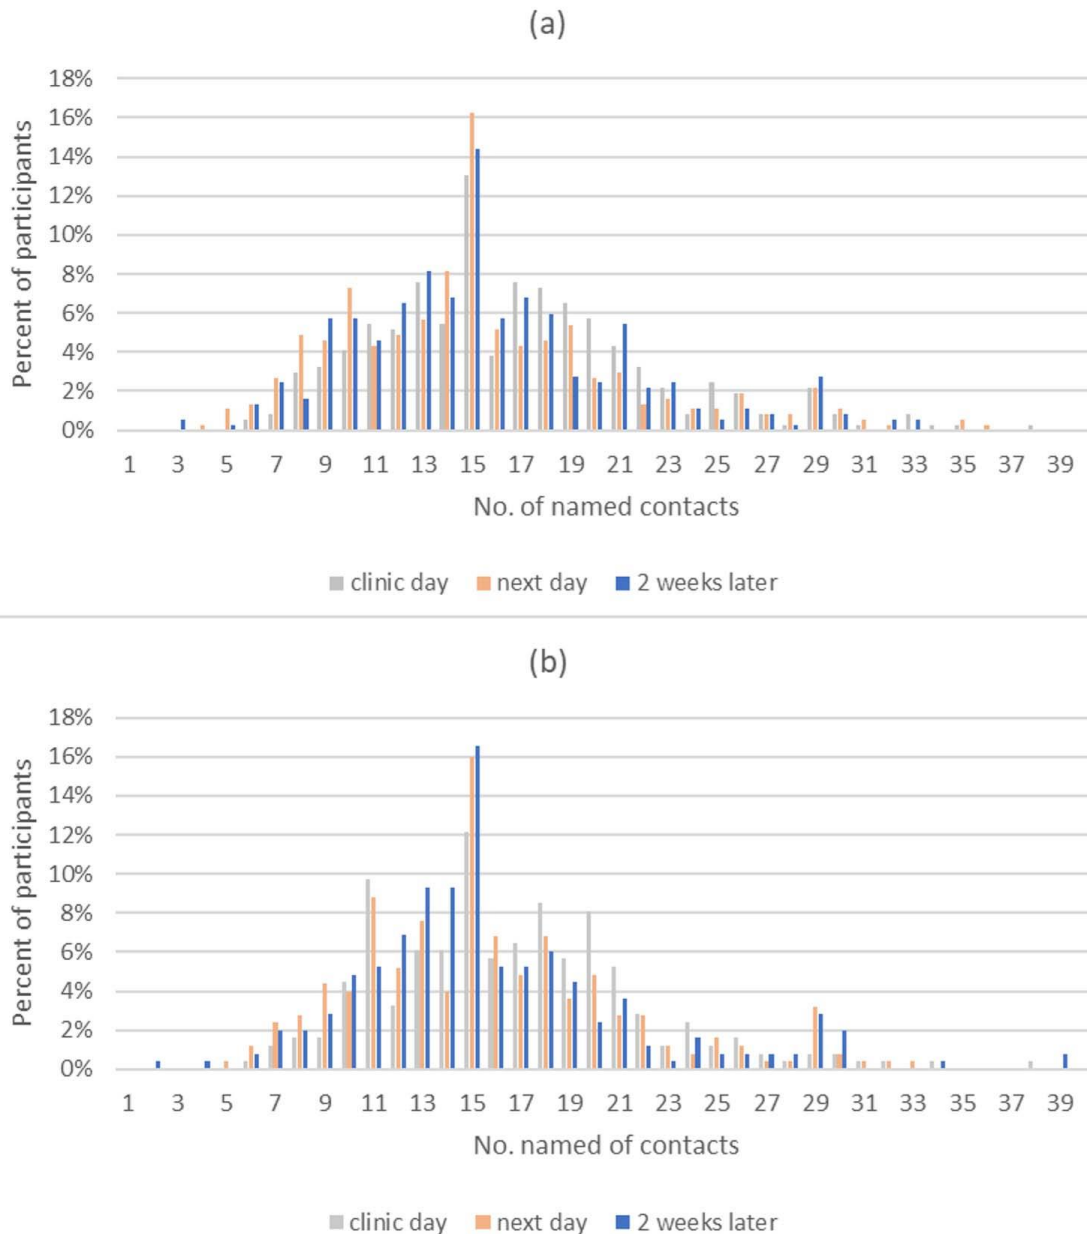

**Figure 1.** Frequency distribution of number of contacts in the three 24-hour periods of (a) patients and (b) caregivers.

|      |           | ALL CONTACTS |      |       |      |                  |      |       |      |        |      |       |      |     |
|------|-----------|--------------|------|-------|------|------------------|------|-------|------|--------|------|-------|------|-----|
|      |           | All          |      |       |      | Duration >=10min |      |       |      | Indoor |      |       |      |     |
|      |           | All          | 0-5y | 6-17y | 18+y | All              | 0-5y | 6-17y | 18+y | All    | 0-5y | 6-17y | 18+y |     |
| Ill  | Patient   | 228          | 15.5 | 2.2   | 5.0  | 8.2              | 13.1 | 2.0   | 4.3  | 6.3    | 6.4  | 0.9   | 2.2  | 3.4 |
|      | 0-5y      | 109          | 14.6 | 3.0   | 4.8  | 6.8              | 12.8 | 2.8   | 4.3  | 5.4    | 6.0  | 0.9   | 2.0  | 3.1 |
|      | 6-17y     | 45           | 15.9 | 1.8   | 6.9  | 7.2              | 13.6 | 1.7   | 6.0  | 5.3    | 7.2  | 0.9   | 2.9  | 3.4 |
|      | 18+y      | 74           | 16.4 | 1.3   | 4.2  | 11.0             | 13.2 | 1.1   | 3.4  | 8.4    | 6.5  | 0.9   | 2.0  | 3.6 |
|      | Caregiver | 154          | 15.6 | 2.0   | 4.2  | 9.4              | 13.0 | 1.8   | 3.6  | 7.1    | 6.6  | 1.3   | 2.2  | 3.0 |
| Well | Patient   | 228          | 15.9 | 2.5   | 5.4  | 8.0              | 13.9 | 2.3   | 4.8  | 6.5    | 7.2  | 1.1   | 2.4  | 3.7 |
|      | 0-5y      | 109          | 15.2 | 3.3   | 5.8  | 6.1              | 13.8 | 3.1   | 5.4  | 5.1    | 6.8  | 1.2   | 2.4  | 3.2 |
|      | 6-17y     | 45           | 16.2 | 2.5   | 7.7  | 6.0              | 14.1 | 2.1   | 6.6  | 5.1    | 7.6  | 1.1   | 2.9  | 3.6 |
|      | 18+y      | 74           | 16.7 | 1.3   | 3.4  | 12.0             | 13.8 | 1.1   | 2.8  | 9.4    | 7.5  | 0.9   | 1.9  | 4.6 |
|      | Caregiver | 154          | 15.9 | 1.8   | 4.1  | 9.9              | 13.7 | 1.8   | 3.8  | 7.6    | 6.6  | 1.3   | 2.3  | 3.0 |

  

|      |           | HOUSEHOLD CONTACTS |      |       |      |                  |      |       |      |        |      |       |      |     |
|------|-----------|--------------------|------|-------|------|------------------|------|-------|------|--------|------|-------|------|-----|
|      |           | All                |      |       |      | Duration >=10min |      |       |      | Indoor |      |       |      |     |
|      |           | All                | 0-5y | 6-17y | 18+y | All              | 0-5y | 6-17y | 18+y | All    | 0-5y | 6-17y | 18+y |     |
| Ill  | Patient   | 228                | 4.4  | 0.6   | 1.6  | 2.2              | 4.2  | 0.6   | 1.6  | 2.1    | 4.2  | 0.6   | 1.5  | 2.1 |
|      | 0-5y      | 109                | 4.4  | 0.5   | 1.6  | 2.3              | 4.2  | 0.5   | 1.5  | 2.2    | 4.2  | 0.5   | 1.5  | 2.2 |
|      | 6-17y     | 45                 | 4.6  | 0.6   | 1.9  | 2.2              | 4.6  | 0.6   | 1.8  | 2.2    | 4.6  | 0.6   | 1.8  | 2.2 |
|      | 18+y      | 74                 | 4.2  | 0.7   | 1.5  | 2.0              | 4.0  | 0.7   | 1.4  | 1.9    | 3.9  | 0.7   | 1.5  | 1.8 |
|      | Caregiver | 154                | 4.4  | 1.1   | 1.8  | 1.5              | 4.3  | 1.1   | 1.8  | 1.4    | 4.2  | 1.1   | 1.7  | 1.4 |
| Well | Patient   | 228                | 4.6  | 0.7   | 1.7  | 2.3              | 4.6  | 0.7   | 1.7  | 2.3    | 4.6  | 0.7   | 1.6  | 2.3 |
|      | 0-5y      | 109                | 4.7  | 0.6   | 1.7  | 2.3              | 4.6  | 0.6   | 1.7  | 2.3    | 4.5  | 0.6   | 1.7  | 2.3 |
|      | 6-17y     | 45                 | 5.2  | 0.7   | 1.8  | 2.7              | 5.1  | 0.7   | 1.7  | 2.6    | 5.2  | 0.7   | 1.7  | 2.7 |
|      | 18+y      | 74                 | 4.3  | 0.7   | 1.6  | 2.0              | 4.3  | 0.7   | 1.6  | 2.0    | 4.2  | 0.7   | 1.5  | 2.0 |
|      | Caregiver | 154                | 4.5  | 1.2   | 1.8  | 1.6              | 4.5  | 1.2   | 1.8  | 1.5    | 4.4  | 1.2   | 1.8  | 1.5 |

  

|      |           | NON-HOUSEHOLD CONTACTS |      |       |      |                  |      |       |      |        |      |       |      |     |
|------|-----------|------------------------|------|-------|------|------------------|------|-------|------|--------|------|-------|------|-----|
|      |           | All                    |      |       |      | Duration >=10min |      |       |      | Indoor |      |       |      |     |
|      |           | All                    | 0-5y | 6-17y | 18+y | All              | 0-5y | 6-17y | 18+y | All    | 0-5y | 6-17y | 18+y |     |
| Ill  | Patient   | 228                    | 11.1 | 1.6   | 3.4  | 6.1              | 8.9  | 1.5   | 2.8  | 4.2    | 2.2  | 0.3   | 0.6  | 1.3 |
|      | 0-5y      | 109                    | 10.3 | 2.6   | 3.2  | 4.5              | 8.6  | 2.4   | 2.7  | 3.1    | 1.8  | 0.4   | 0.5  | 0.9 |
|      | 6-17y     | 45                     | 11.2 | 1.2   | 5.1  | 5.0              | 9.0  | 1.1   | 4.2  | 3.2    | 2.6  | 0.3   | 1.1  | 1.2 |
|      | 18+y      | 74                     | 12.2 | 0.6   | 2.6  | 9.0              | 9.2  | 0.4   | 1.9  | 6.5    | 2.5  | 0.2   | 0.5  | 1.9 |
|      | Caregiver | 154                    | 11.2 | 0.8   | 2.4  | 8.0              | 8.7  | 0.7   | 1.9  | 5.6    | 2.3  | 0.2   | 0.5  | 1.6 |
| Well | Patient   | 228                    | 11.2 | 1.8   | 3.7  | 5.7              | 9.3  | 1.6   | 3.1  | 4.2    | 2.6  | 0.4   | 0.7  | 1.5 |
|      | 0-5y      | 109                    | 10.5 | 2.7   | 4.0  | 3.8              | 9.2  | 2.6   | 3.7  | 2.7    | 2.3  | 0.6   | 0.8  | 0.9 |
|      | 6-17y     | 45                     | 11.0 | 1.8   | 5.9  | 3.3              | 9.0  | 1.4   | 4.9  | 2.5    | 2.4  | 0.4   | 1.1  | 0.9 |
|      | 18+y      | 74                     | 12.4 | 0.5   | 1.8  | 10.0             | 9.5  | 0.4   | 1.2  | 7.5    | 3.2  | 0.1   | 0.4  | 2.7 |
|      | Caregiver | 154                    | 11.3 | 0.7   | 2.3  | 8.3              | 9.2  | 0.6   | 2.0  | 6.1    | 2.2  | 0.2   | 0.5  | 1.5 |

**Figure 2.** Matrices of mean number of contacts when ill (the day after the clinic visit) and when well (two weeks later) by age group and contact type.

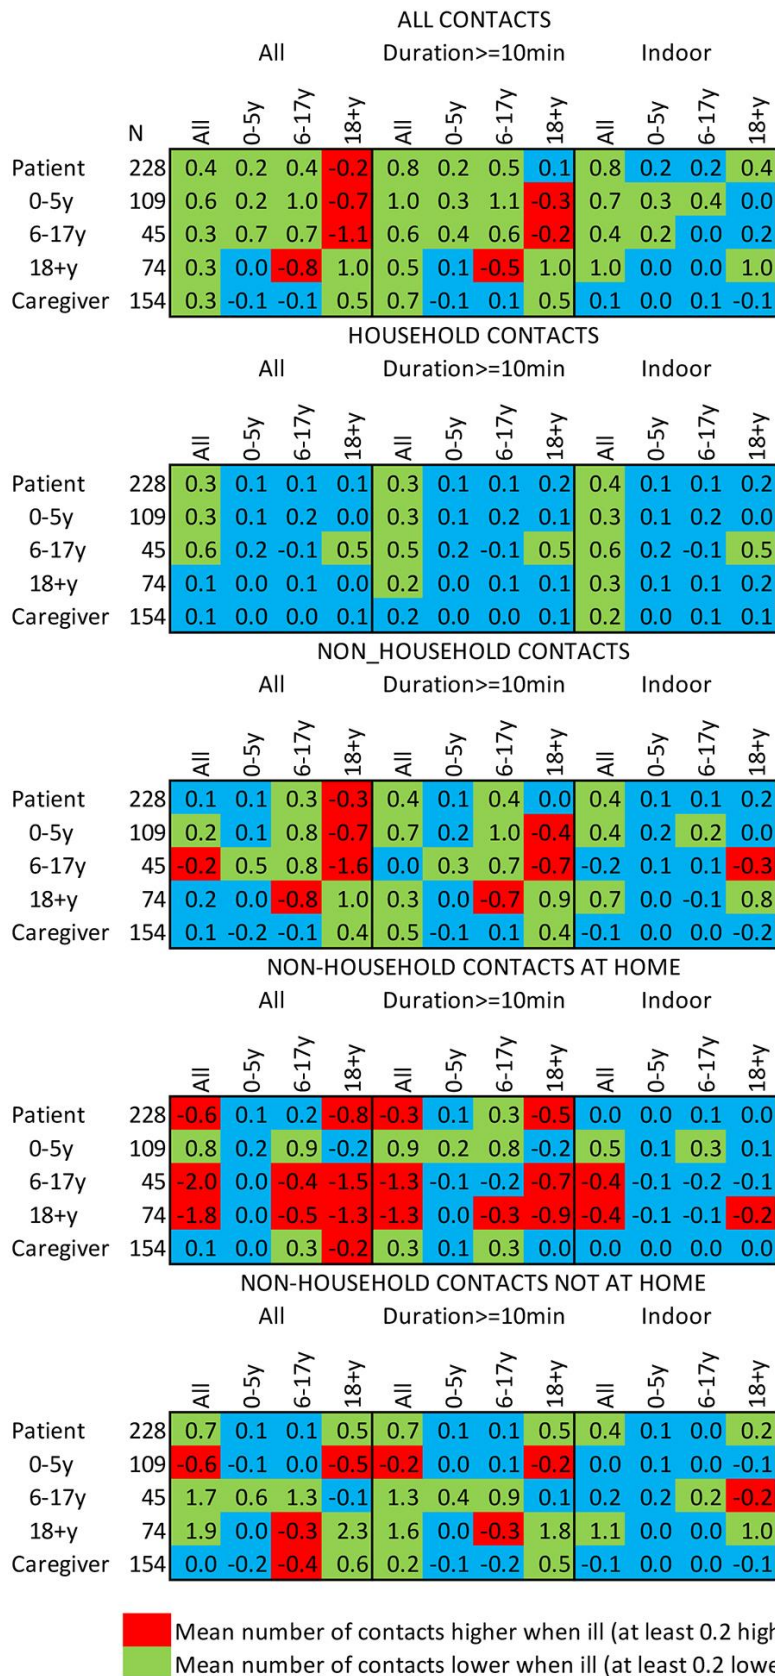

**Figure 3.** Matrices of mean difference in number of household and non-household contacts when well compared to when ill (the day after the clinic visit) by age group and setting. Restricted to those seen on the same day of the week at each visit.
